# Supplementary material
Source: PubMed Central journal article supplement (PMC3427831)
Supplement: NIHMS329593-supplement-1_si_001.pdf [file NIHMS329593-supplement-1_si_001.pdf]

Supporting Information for:

***In situ* AFM Study of Amelogenin Assembly and Disassembly Dynamics on Charged Surfaces Provides Insights on Matrix Protein Self-Assembly**

Chun-Long Chen,<sup>†</sup> Keith M. Bromley,<sup>‡</sup> Janet Moradian-Oldak<sup>†\*</sup> and James J. DeYoreo<sup>†\*</sup>

<sup>†</sup>The Molecular Foundry, Lawrence Berkeley National Laboratory, 1 Cyclotron Road, Berkeley, CA 94720; and

<sup>‡</sup>Center for Craniofacial Molecular Biology, Herman Ostrow School of Dentistry, University of Southern California,  
Los Angeles, CA 90033, United States

To whom correspondence may be addressed. Email: [jjdeyoreo@lbl.gov](mailto:jjdeyoreo@lbl.gov) or [joldak@usc.edu](mailto:joldak@usc.edu)

**This file includes:**

Table S1 and Fig. S1 to S4

Calibration curves to show the correlation between protein molecular weight and height from *ex-situ* AFM (Light blue curve), *in situ* AFM (Blue curve) and hydrodynamic diameters (green curve) (modified from reference <sup>1</sup>)

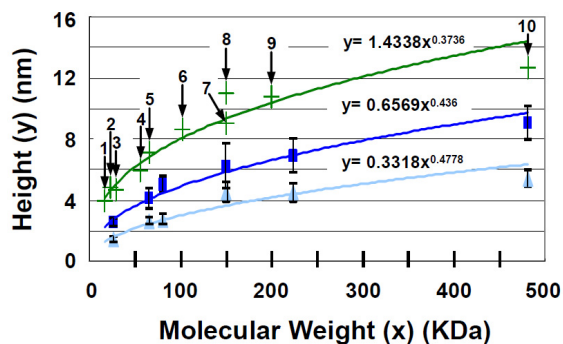

| Molecular Weight | <i>Ex situ</i> AFM Height | <i>In situ</i> AFM Height | Hydrodynamic Diameter |
|------------------|---------------------------|---------------------------|-----------------------|
| 20 kDa           | 1.4 nm                    | 2.4 nm                    | 4.4 nm                |
| 40 kDa           | 1.9 nm                    | 3.3 nm                    | 5.7 nm                |
| 60 kDa           | 2.3 nm                    | 3.9 nm                    | 6.6 nm                |
| 80 kDa           | 2.7 nm                    | 4.4 nm                    | 7.4 nm                |
| 100 kDa          | 3.0 nm                    | 4.9 nm                    | 8.0 nm                |
| 120 kDa          | 3.3 nm                    | 5.3 nm                    | 8.6 nm                |
| 140 kDa          | 3.5 nm                    | 5.7 nm                    | 9.1 nm                |
| 160 kDa          | 3.7 nm                    | 6.0 nm                    | 9.5 nm                |
| 180 kDa          | 4.0 nm                    | 6.3 nm                    | 10.0 nm               |
| 200 kDa          | 4.2 nm                    | 6.6 nm                    | 10.4 nm               |
| 240 kDa          | 4.6 nm                    | 7.2 nm                    | 11.1 nm               |
| 420 kDa          | 5.9 nm                    | 9.1 nm                    | 13.7 nm               |
| 440 kDa          | 6.1 nm                    | 9.3 nm                    | 13.9 nm               |
| 800 kDa          | 8.1 nm                    | 12.1 nm                   | 17.4 nm               |
| 2340 kDa         | 13.5 nm                   | 19.3 nm                   | 26.0 nm               |

Table S1. Amelogenin rP172 parameters generated from the previously established protein calibration curves.<sup>1</sup>

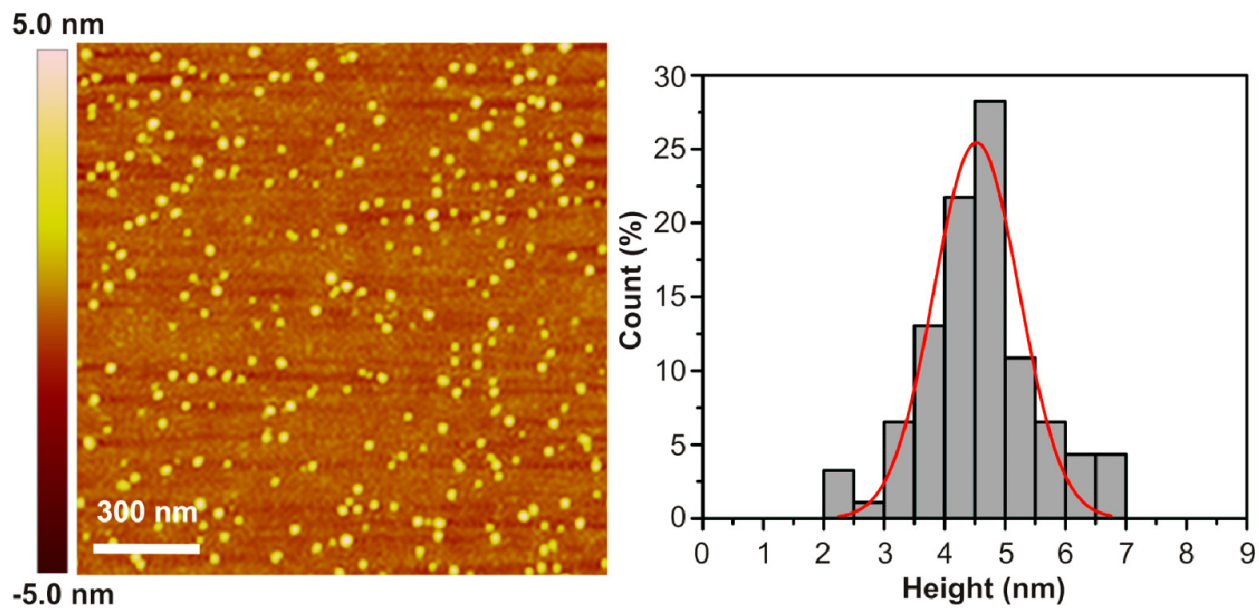

Figure S1. (a) Tapping mode *ex situ* AFM height image of uniform amelogenin particles on mica surface at pH 8.0, height =  $4.5 \pm 0.9$  nm, based on 92 counts.

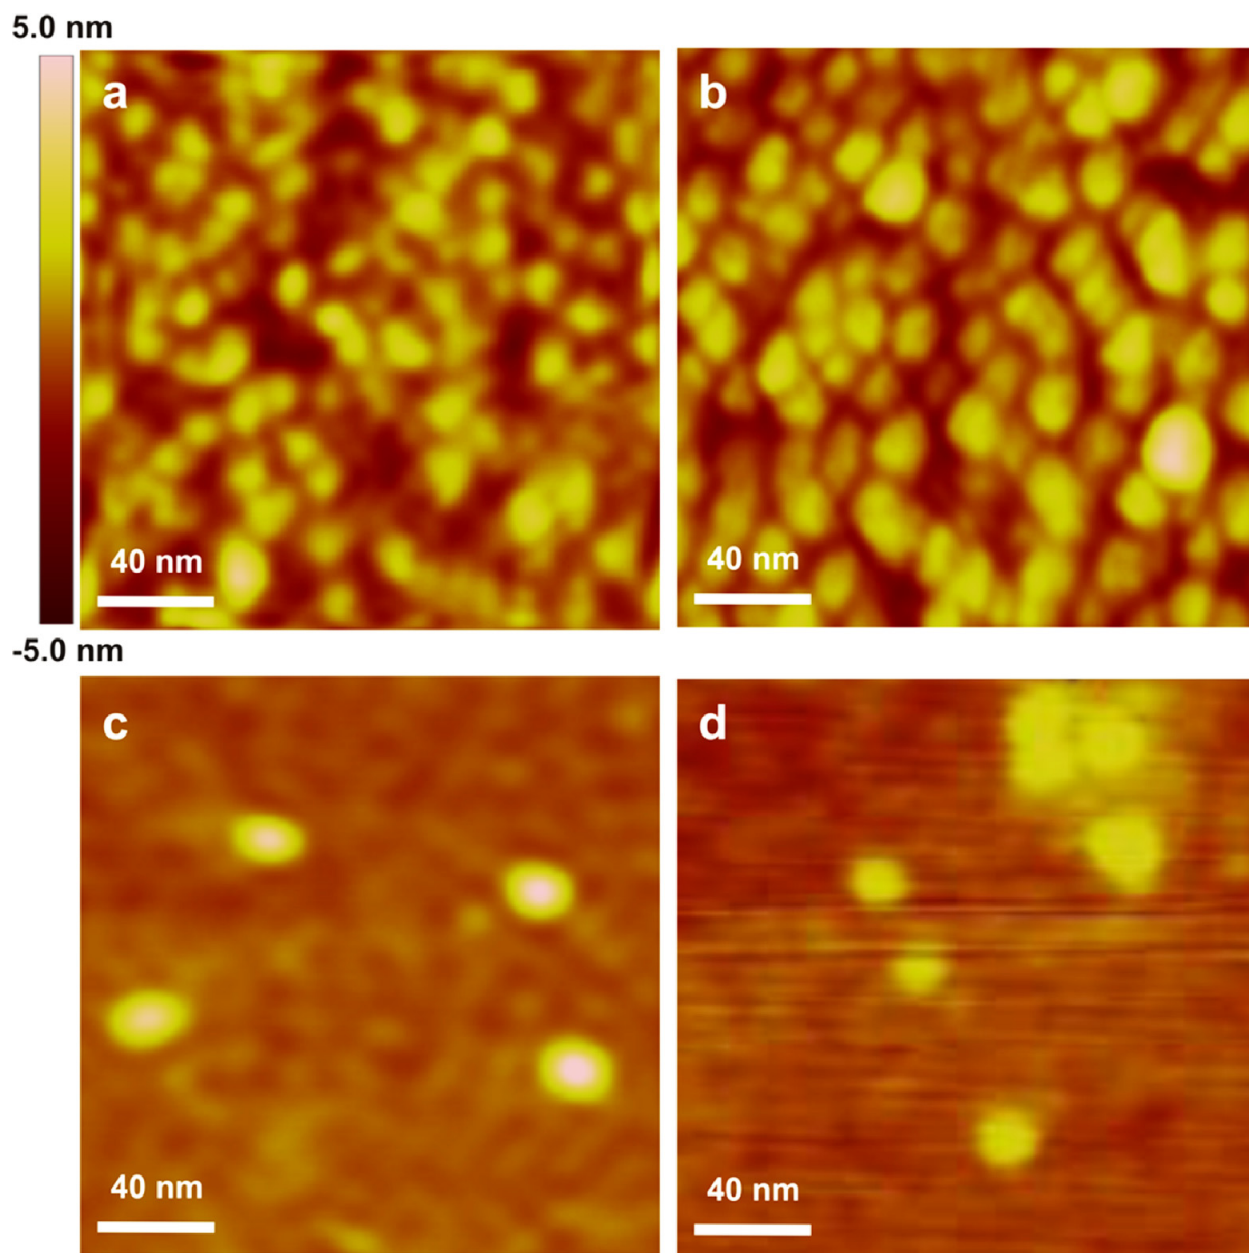

Figure S2. *Ex situ* AFM height images of amelogenin particles at pH8.0 under different conditions to show the tip convolution effects. (a) ScanAsyst mode, sharpened tip, diameter =  $\sim 9.0$  nm. (b) ScanAsyst mode, contaminated tip, diameter =  $\sim 15.0$  nm. (c) Tapping mode, contaminated tip, diameter =  $\sim 23$  nm. (d) Tapping mode, modified from reference<sup>2</sup>, diameter =  $\sim 20$  nm.

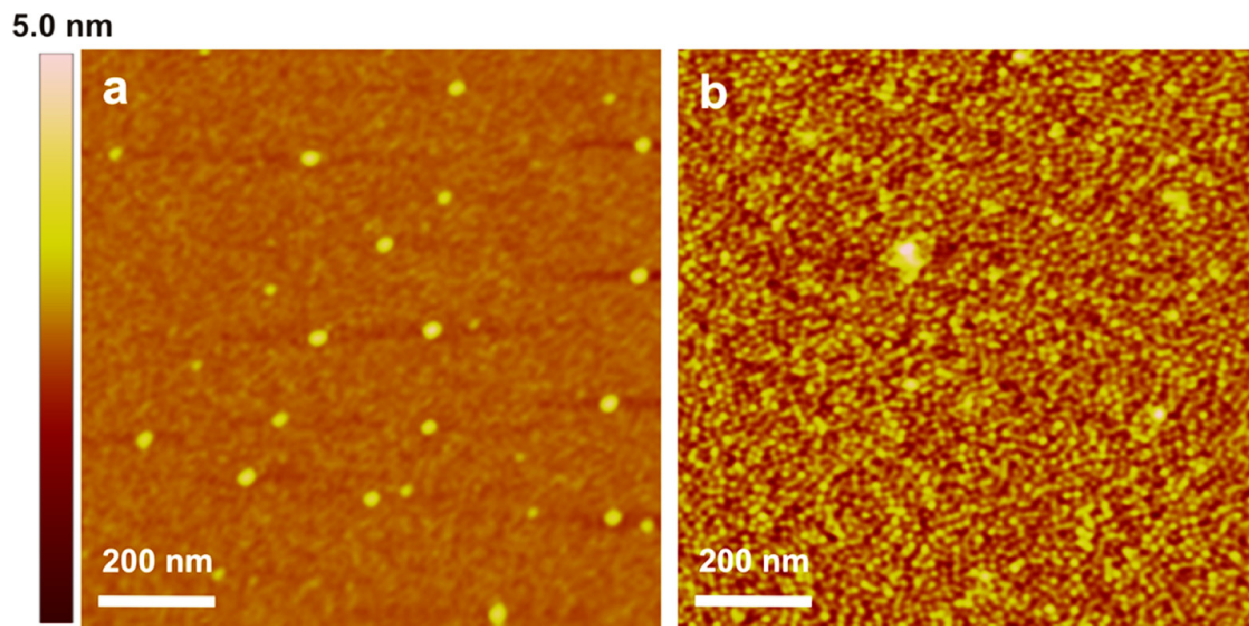

**-5.0 nm**  
 Figure S3. *Ex situ* AFM height images of amelogenin oligomeric particles at pH 8.0. (a) On mica surface, oligomer density =  $25 / \mu\text{m}^2$ . (b) On APS mica surface, oligomer density =  $2029 / \mu\text{m}^2$ .

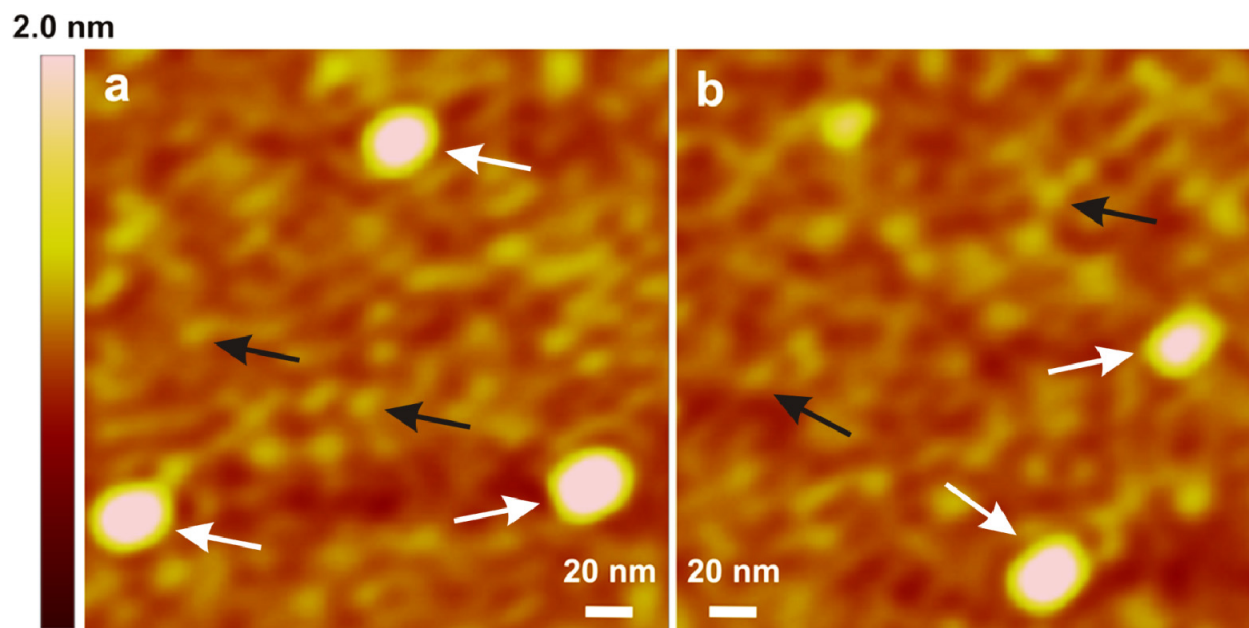

**-2.0 nm**  
 Figure S4, *Ex situ* AFM height images of amelogenin particles at pH 8.0 on mica surface to show the co-existence of large amount of amelogenin monomers on mica surface along with amelogenin oligomers. White and black arrows indicate amelogenin oligomers and monomers respectively.

## References

- (1) Cho, K. R.; Huang, Y.; Yu, S. L.; Yin, S. M.; Plomp, M.; Qiu, S. R.; Lakshminarayanan, R.; Moradian-Oldak, J.; Sy, M. S.; De Yoreo, J. J. *J. Am. Chem. Soc.* **2011**, *133*, 8586.
- (2) Du, C.; Falini, G.; Fermani, S.; Abbott, C.; Moradian-Oldak, J. *Science* **2005**, *307*, 1450.
